# Supplementary material
Source: publisher figshare collection journal article supplement (https://sage.figshare.com/ndownloader/files/12370769)
Supplement: Supplementary file 1 [file 12370769]

**Table C. Summary of the initial modifications to the causal sub-scale of the Stroke IPQ-R**

| Item                                                          | Change(s) made                                         | Rationale                                                                                                                         |
|---------------------------------------------------------------|--------------------------------------------------------|-----------------------------------------------------------------------------------------------------------------------------------|
| Stress or worry                                               | -                                                      | -                                                                                                                                 |
| Hereditary – it runs in my family                             | -                                                      | -                                                                                                                                 |
| Diet or eating habits                                         | -                                                      | -                                                                                                                                 |
| Poor medical care in my past                                  | -                                                      | -                                                                                                                                 |
| My own behaviour                                              | -                                                      | -                                                                                                                                 |
| My mental attitude e.g., thinking about life negatively       | -                                                      | -                                                                                                                                 |
| Family problems or worries caused my stroke                   | -                                                      | -                                                                                                                                 |
| Overwork                                                      | -                                                      | -                                                                                                                                 |
| My emotional state e.g., feeling down, lonely, anxious, empty | -                                                      | -                                                                                                                                 |
| Ageing                                                        | -                                                      | -                                                                                                                                 |
| Alcohol                                                       | -                                                      | -                                                                                                                                 |
| Smoking                                                       | -                                                      | -                                                                                                                                 |
| My personality                                                | -                                                      | -                                                                                                                                 |
| High cholesterol                                              | Added                                                  | Considered relevant to stroke by expert panel                                                                                     |
| High blood pressure                                           | Added                                                  |                                                                                                                                   |
| Diabetes                                                      | Added                                                  |                                                                                                                                   |
| Irregular heartbeat                                           | Added; wording changed to 'Problems with my heart'     | Considered relevant to stroke by expert panel; wording subsequently changed in order to improve comprehension by stroke survivors |
| A germ or virus                                               | -                                                      | -                                                                                                                                 |
| Chance or bad luck                                            | -                                                      | -                                                                                                                                 |
| Inactive lifestyle                                            | Added; wording changed to 'Not taking enough exercise' | Considered relevant to stroke by expert panel; wording subsequently changed to be consistent with Twiddy-version                  |
| Accident or injury                                            | -                                                      | -                                                                                                                                 |
| Pollution in the environment                                  | Removed                                                | Not considered relevant to stroke by expert panel                                                                                 |
| Altered immunity                                              | Removed                                                |                                                                                                                                   |
